# Supplementary material for: Microstructure modulation improving the mechanical and electrochemical properties of Pb-Ag-Ca Alloy
Source: Research Square preprint supplement (doi:10.21203/rs.3.rs-8738029/v1), 2026-02-09
Supplement: Supplementary file 1 [file a17be8ce280f5242c9d4089c.docx]

Supplementary Material

**Microstructure modulation improving the mechanical and electrochemical properties of Pb-Ag-Ca Alloy**

*Dacheng Liu1,3, Yiwen Chen**1, Ruidong Xu1,2, Buming Chen1,2,3*, Jun Guo1,2*， Zhongcheng Guo1,2,3*

*1* *Faculty of Metallurgical and Energy Engineering, Kunming University of Science and Technology, Kunming 650093, China*

*2 Research Center of Metallurgical Electrode Materials Engineering Technology, Yunnan Province, Kunming 650106, China*

*3 Kunming Hendera Science and Technology Co., Ltd., Kunming, 650106, China)*

*** ***Corresponding Author Email:*** [***bumchen@kust.edu.cn***](mailto:bumchen@kust.edu.cn) ***(B. Chen);*** [***1308gj@kust.edu.cn (J. Guo)***](mailto:1308gj@kust.edu.cn%20(J.%20Guo))***;***

The supporting information includes 2 pages and 2 figures.


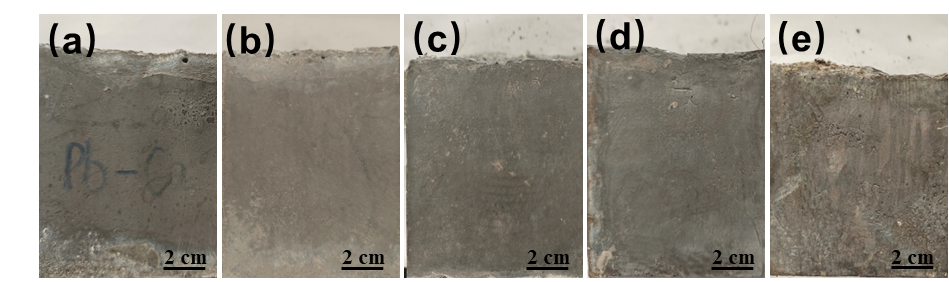


Fig.S1 (a) Cast alloy with 0 r/min, (b) Cast alloy with 50 r/min, (c) Cast alloy with 100 r/min, (d) Cast alloy with 150 r/min, (e) Cast alloy with 200 r/min


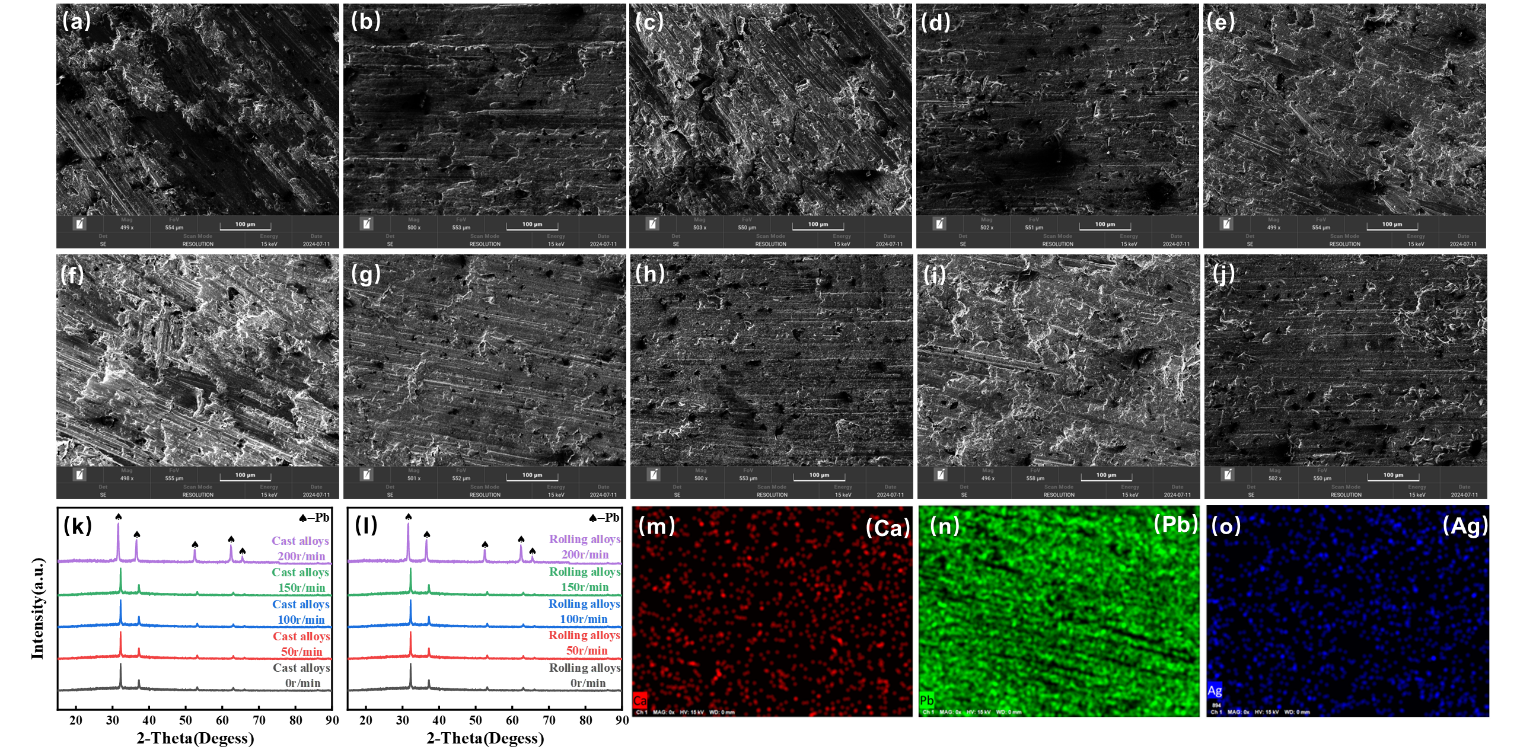


Fig. S2 (a)SEM of cast alloy with 0 r/min, (b)SEM of cast alloy with 50 r/min, (c)SEM of cast alloy with 100 r/min, (d)SEM of cast alloy with 150 r/min, (e)SEM of cast alloy with 200 r/min, (f)SEM of rolling alloy with 0 r/min, (g)SEM of rolling alloy with 50 r/min, (h)SEM of rolling alloy with 100 r/min, (i)SEM of rolling alloy with 150 r/min, (j)SEM of rolling alloy with 200 r/min, (k)XRD of Cast alloy, (l)XRD of rolling alloy, (m)EDS of Ca, (n) EDS of Pb, (o) EDS of Ag
